# Supplementary material for: Comprehensive Analysis of lncRNA Expression Profile and the Potential Role of ENST00000604491 in Graves' Disease
Source: J Immunol Res. 2022 Apr 25;2022:8067464. doi: 10.1155/2022/8067464 (PMC9061081; doi:10.1155/2022/8067464)
Supplement: Supplementary Materials — The clinical features of volunteers for lncRNA sequencing and the primers of qRT–PCR are shown in supplementary materials. [file 8067464.f1.zip]

Archive with 2 entries (2 files):
- 8067464-Table S1.docx
- 8067464-Table S2.docx
